# Supplementary material for: An interrupted PET coupled TBET process for the design of a specific receptor for Hg2+ and its intracellular detection in MCF7 cells
Source: Royal Society of Chemistry journal article supplement (doi:10.1039/c2cc34490d), 2012-01-01
Supplement: c2cc34490d.pdf [file c2cc34490d.pdf]

## Supporting Information

Sukdeb Saha,<sup>a</sup> Prasenjit Mahato,<sup>a</sup> Mithu Baidya,<sup>b</sup> Sudip K. Ghosh,<sup>b\*</sup> and Amitava Das<sup>a\*</sup>

<sup>a</sup>CSIR-Central Salt and Marine Chemicals Research Institute, Bhavnagar, Gujarat-364002, India.

<sup>b</sup>Department of Biotechnology, Indian Institute of Technology, Kharagpur, West Bengal-721302, India.

| Contents                                                                                                          | Page No. |
|-------------------------------------------------------------------------------------------------------------------|----------|
| 1. Synthetic methodology of <b>L</b> <sub>1</sub>                                                                 | 2        |
| 2. <sup>1</sup> H NMR spectra of <b>L</b> <sub>1</sub>                                                            | 3        |
| 3. <sup>13</sup> C NMR spectra of <b>L</b> <sub>1</sub>                                                           | 4        |
| 4. ESI-Ms spectra of <b>L</b> <sub>1</sub>                                                                        | 5        |
| 5. FTIR spectra of <b>L</b> <sub>1</sub>                                                                          | 6        |
| 6. Synthetic methodology for the receptor <b>L</b> <sub>2</sub>                                                   | 7        |
| 7. <sup>1</sup> H NMR spectra of <b>L</b> <sub>2</sub>                                                            | 8        |
| 8. <sup>13</sup> C NMR spectra of <b>L</b> <sub>2</sub>                                                           | 9        |
| 9. ESI-Ms spectra of <b>L</b> <sub>2</sub>                                                                        | 10       |
| 10. <sup>13</sup> C NMR of <b>L</b> <sub>1</sub> in absence and in presence of Hg <sup>2+</sup>                   | 11       |
| 11. Beneshi-Hildebrand plot of absorbance titration between <b>L</b> <sub>1</sub> and Hg <sup>2+</sup>            | 12       |
| 12. Beneshi-Hildebrand plot of Emission titration between <b>L</b> <sub>1</sub> and Hg <sup>2+</sup>              | 13       |
| 13. Equation used for energy transfer efficiency calculation                                                      | 14       |
| 14. ESI-Ms spectra of <b>L</b> <sub>1</sub> in presence of Hg(ClO <sub>4</sub> ) <sub>2</sub> showing 1:1 binding | 15       |
| 15. <sup>1</sup> H NMR titration of <b>L</b> <sub>1</sub> as a function of Hg(ClO <sub>4</sub> ) <sub>2</sub>     | 16       |
| 16. Interference study of <b>L</b> <sub>1</sub> with Hg <sup>2+</sup> in presence of various metal ions           | 17       |
| 17. Uv-Vis study for establishing the reversible binding of Hg <sup>2+</sup> to <b>L</b> <sub>1</sub>             | 18       |
| 18. Change of Emission intensity of <b>L</b> <sub>1</sub> as a function of pH                                     | 19       |
| 19. FTIR Spectra of <b>L</b> <sub>1</sub> in presence of 5 equivalent of Hg(ClO <sub>4</sub> ) <sub>2</sub>       | 20       |
| 20. Bar diagram for changes in the absorbance intensity for <b>L</b> <sub>1</sub> with Metal ions                 | 21       |
| 21. Bar diagram for changes in the Emission intensity for <b>L</b> <sub>1</sub> with Metal ions                   | 22       |
| 22. Job's plot for <b>L</b> <sub>1</sub> with Hg <sup>2+</sup> showing 1:1 stoichiometry                          | 23       |
| 23. Absorption spectra of <b>L</b> <sub>1</sub> in presence of Hg <sup>2+</sup> at different pH                   | 24       |
| 24. Emission spectra of <b>L</b> <sub>1</sub> in presence of Hg <sup>2+</sup> at different pH                     | 25       |
| 25. Confocal microscopic images of <b>L</b> <sub>1</sub> with Hg <sup>2+</sup> in MCF7 cells                      | 26       |
| 26. Fluorescence microscopic images of <b>L</b> <sub>1</sub> with Hg <sup>2+</sup>                                | 27       |
| 27. Reversibility studies for binding of the <b>L</b> <sub>1</sub> .Hg <sup>2+</sup> with KI with in the cells    | 28       |
| 28. MTT assay studies for evolution of cytotoxicity of the reagent <b>L</b> <sub>1</sub>                          | 29       |

### Synthetic methodology for L<sub>1</sub>:

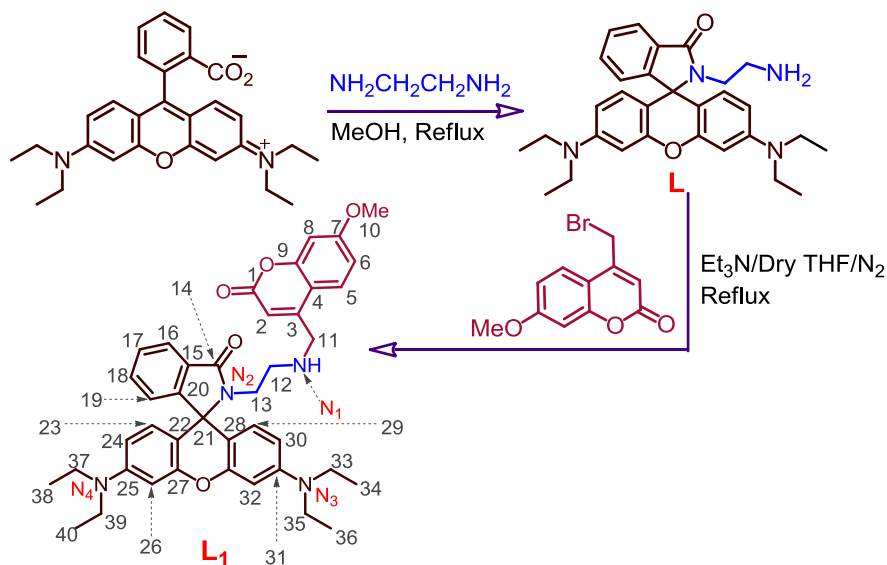

Amino ethyl rhodamine (**L**) (200 mg, 0.413 mmole) was dissolved in 20 ml of dry Tetrahydrofuran (THF). To this, Et<sub>3</sub>N (62μl, 0.454 mmole) was added and the resulting solution was kept under N<sub>2</sub> for 15 minutes. Then 4-bromomethyl-7-methoxy coumarin (111 mg, 0.413 mmole) was taken in 10 ml of dry THF and added into the stirring solution in drop wise fashion. It was kept under reflux condition with stirring for 10h until all the starting materials become consumed. After that, solvent was removed with rotary evaporator. Then it was dissolved in 20 ml of CHCl<sub>3</sub> and washed with 10 ml of water. The organic layer was collected and dried over anhydrous Na<sub>2</sub>SO<sub>4</sub> before concentration. It was finally purified by column chromatography using silica gel as stationary phase and CHCl<sub>3</sub> as solvent to isolate an off-white solid **L**<sub>1</sub> in pure form with 87% yield (yield was calculated based on the starting reagents). <sup>1</sup>H NMR (500 MHz, CD<sub>3</sub>CN, SiMe<sub>4</sub>, *J* (Hz), δ ppm): 7.811 (1H, m, H<sub>18</sub>), 7.512-7.483 (3H, m, H<sub>17</sub>, H<sub>19</sub>, H<sub>20</sub>), 6.991 (1H, t, *J* = 3.5Hz, H<sub>7</sub>), 6.857 (1H, s, H<sub>9</sub>), 6.837(1H, d, *J* = 1.5 Hz, H<sub>6</sub>), 6.398 (1H, s, H<sub>27</sub>), 6.380 (1H, s, H<sub>33</sub>), 6.329 (1H, d, *J* = 2.5 Hz, H<sub>30,24</sub>), 6.306 (1H, s, H<sub>31</sub>), 6.286 (1H, s, H<sub>25</sub>), 6.091 (1H, s, H<sub>2</sub>), 3.849 (3H, s, H<sub>11</sub>), 3.55 (2H, s, H<sub>12</sub>), 3.288 (8H, q, *J* = 7 Hz, H<sub>31</sub>, 40, 34, 36), 3.208 (2H, t, *J* = 6Hz, H<sub>14</sub>), 2.451 (2H, t, *J* = 7 Hz, H<sub>13</sub>), 1.069 (12H, t, *J* = 7 Hz, H<sub>35,36,39,41</sub>). <sup>13</sup>C NMR (500 MHz, CD<sub>3</sub>CN, SiMe<sub>4</sub>, δ ppm) : 167.637, 162.041, 160.458, 154.917, 154.139, 153.417, 152.791, 148.437, 132.118, 130.710, 128.160, 128.011, 127.792, 123.017, 121.905, 116.900, 111.613, 111.218, 108.984, 107.789, 104.963, 100.355, 96.882, 64.166, 55.180, 47.924, 46.976, 39.247, 28.926, 11.358. ESI-MS (+ve mode, *m/z*): 673.36 (*M* + H<sup>+</sup>), Calc. for C<sub>41</sub>H<sub>44</sub>N<sub>4</sub>O<sub>5</sub> is 672.33.

### $^1\text{H}$ NMR spectra of $\text{L}_1$ in $\text{CD}_3\text{CN}$ :

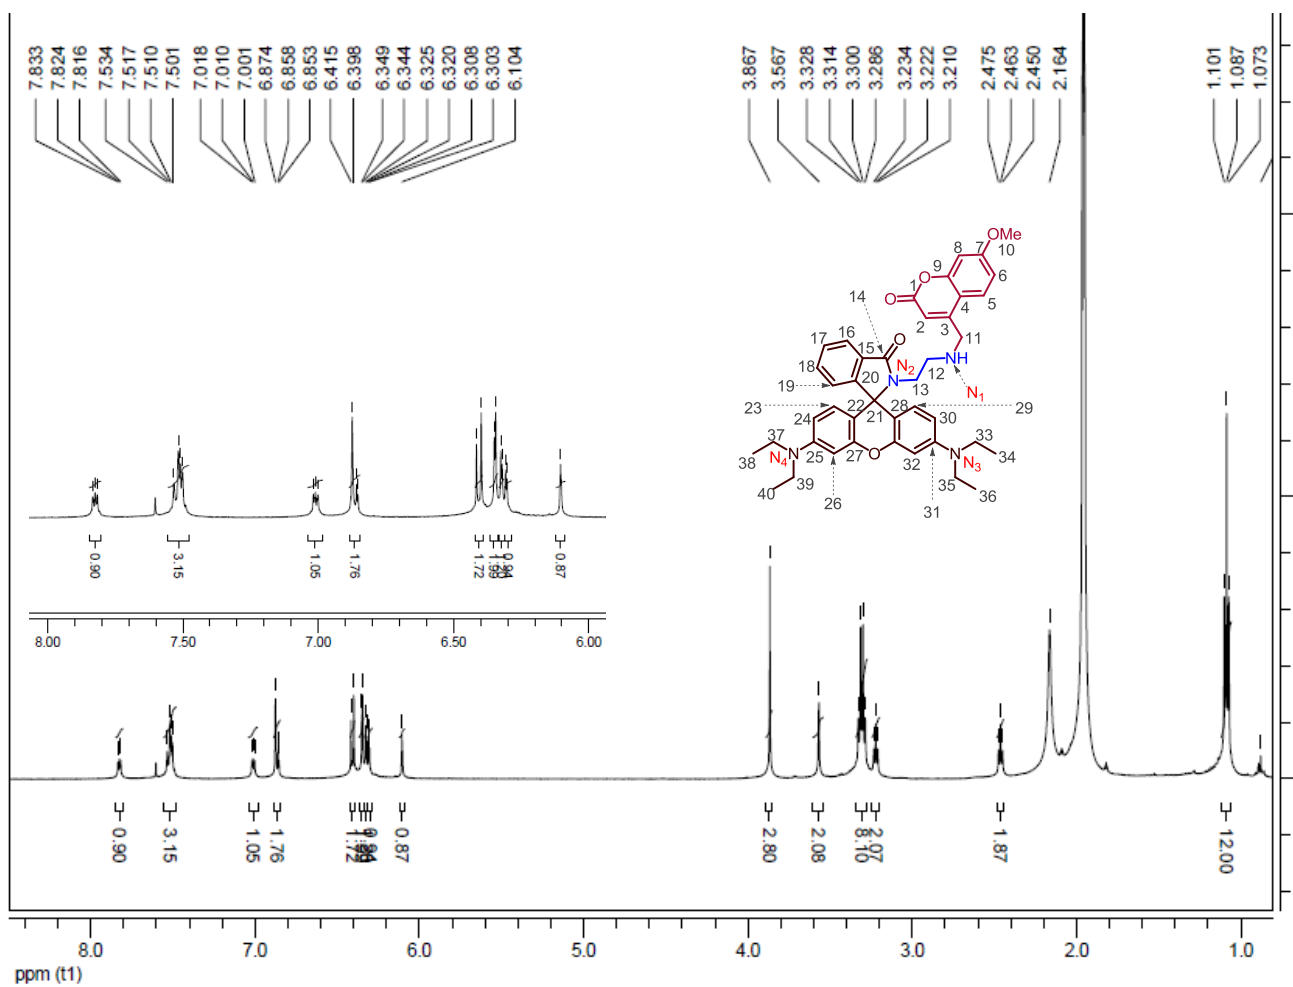

SI Figure 1:  $^1\text{H}$  NMR of  $\text{L}_1$  in  $\text{CD}_3\text{CN}$ .

**$^{13}\text{C}$  NMR spectra of  $\text{L}_1$  in  $\text{CD}_3\text{CN}$ :**

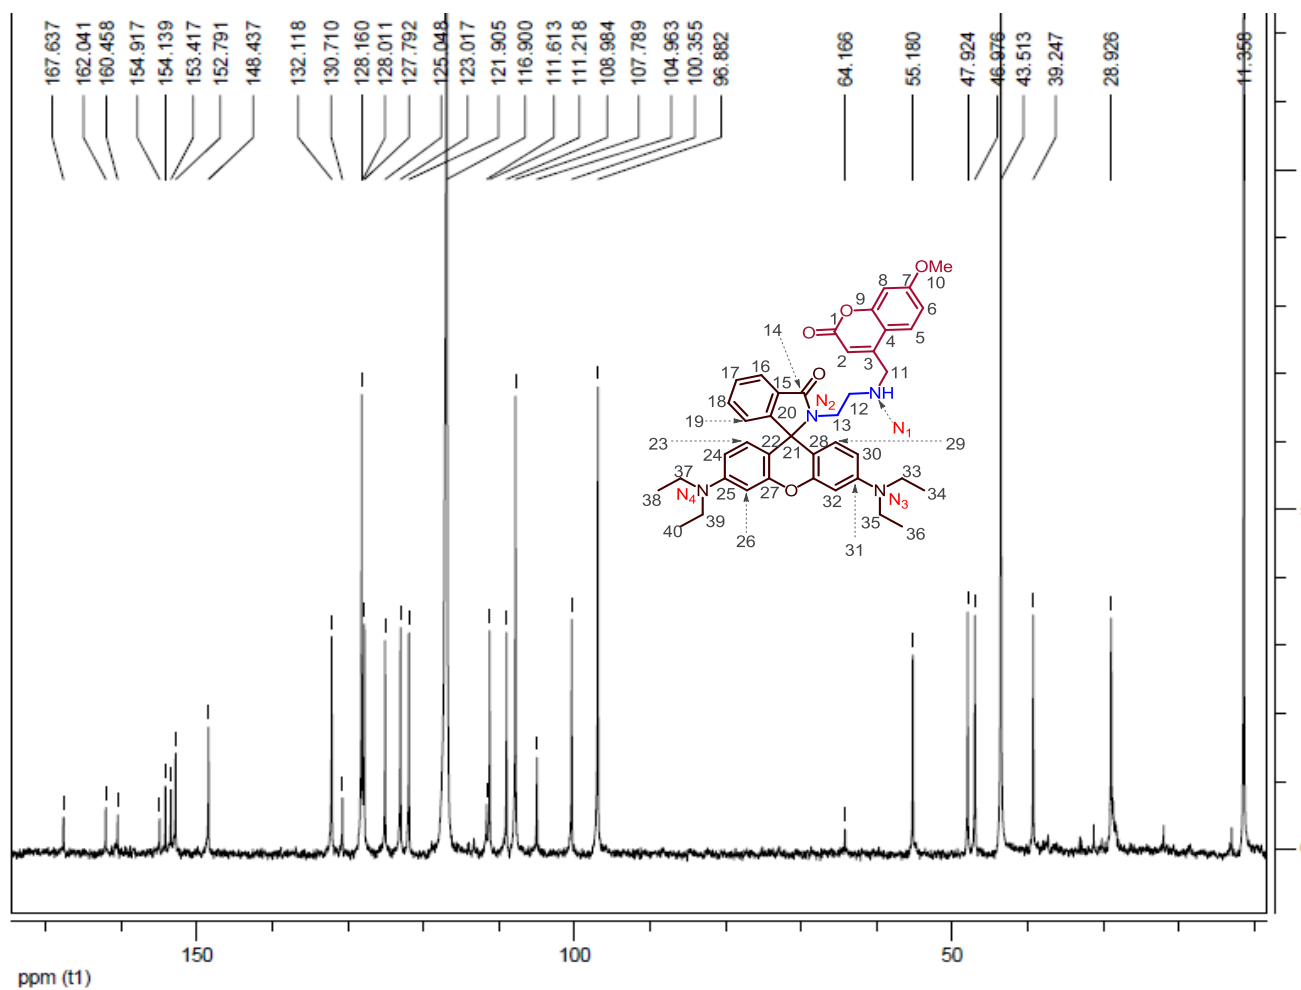

**SI Figure 2:**  $^{13}\text{C}$  NMR spectra of  $\text{L}_1$  in  $\text{CD}_3\text{CN}$ .

### ESI-MS spectra of L<sub>1</sub>:

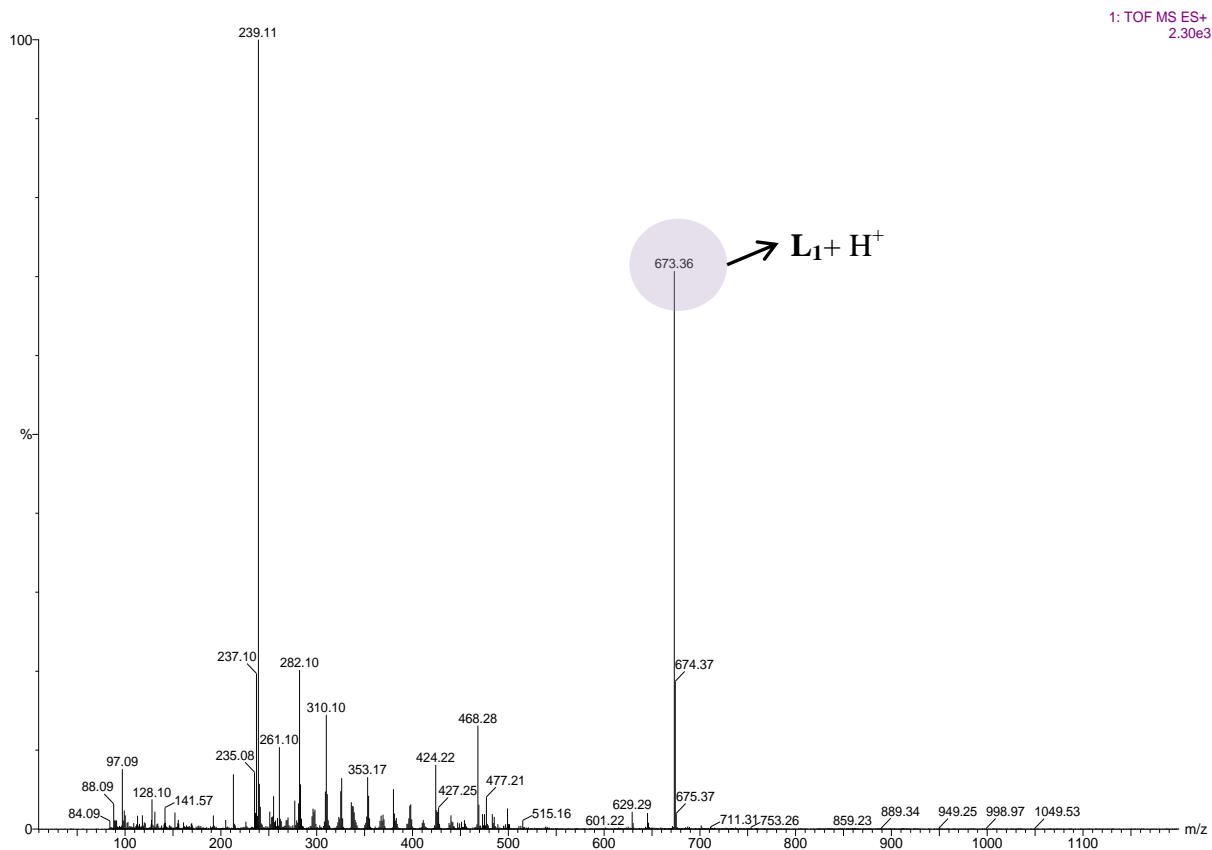

SI Figure 3: ESI-MS spectra of L<sub>1</sub>.

### FTIR Spectra of L<sub>1</sub>:

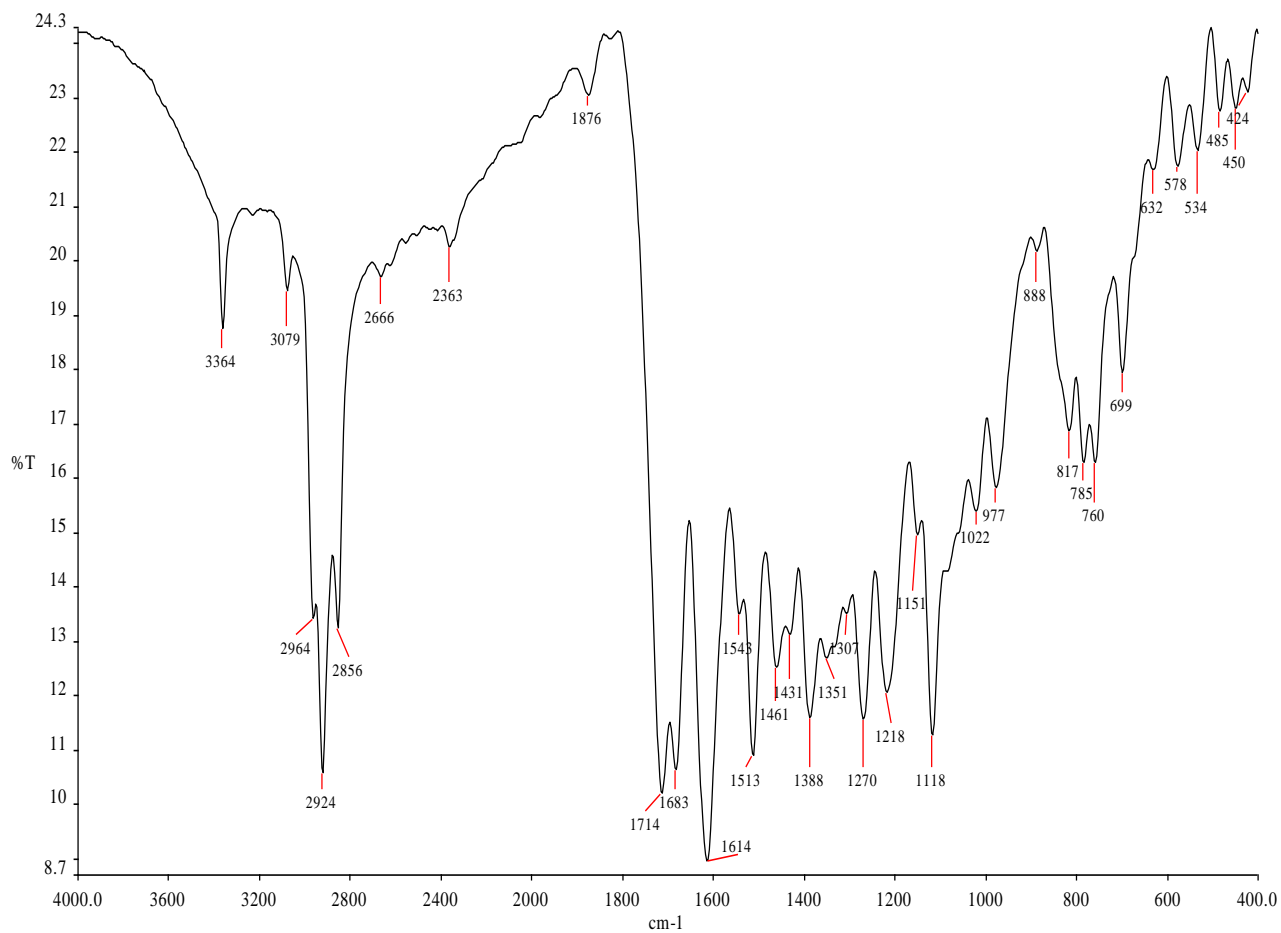

SI Figure 4: FTIR spectra of L<sub>1</sub>.

### Synthetic methodology for the receptor 4-((benzylamino)methyl)-7-methoxy-2H-chromen-2-one **L<sub>2</sub>**:

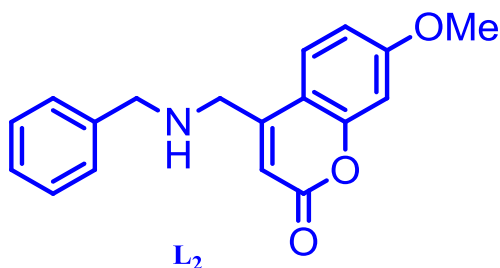

Benzyl amine (0.26 mmole) was dissolved in 5 ml of dry Tetrahydrofuran (THF). To this, Et<sub>3</sub>N (28μl) was added and the resulting solution was kept under N<sub>2</sub> for 15 minutes. Then 4-bromomethyl-7-methoxy coumarine (66.2 mg, 0.26 mmole) was taken in another 5 ml of dry THF and added into the stirring solution in drop wise fashion. It was kept at reflux temperature under N<sub>2</sub> atmosphere with stirring for 10h until all the starting materials become consumed. After that, solvent was removed with rotary evaporator. Then it was dissolved in 10 ml of CHCl<sub>3</sub> and washed with 5ml of water. The organic layer was collected and dried over anhydrous Na<sub>2</sub>SO<sub>4</sub> before concentration. It was finally purified by column chromatography using silica gel as stationary phase and MeOH: CHCl<sub>3</sub> (1:49) as solvent to isolate yellow solid **L<sub>2</sub>** in pure form with 91% yield (yield was calculated based on the starting reagents). <sup>1</sup>H NMR (500 MHz, CD<sub>3</sub>CN: CDCl<sub>3</sub>, 1:1, SiMe<sub>4</sub>, J (Hz), δ ppm): 7.456 (1H, dd, J= 2.5 Hz), 7.380-7.320 (4H, m), 7.257 (1H, t, J= 7.5 Hz), 6.889-6.869 (3H), 6.337 (1H, s), 3.91 (2H), 3.861 (3H, s), 3.843 (2H, s). <sup>13</sup>C NMR(500 MHz, CDCl<sub>3</sub>, δ ppm): 50.605, 55.361, 57.579, 102.850, 112.425, 114.164, 126.950, 129.226, 130.006, 130.433, 141.244, 155.474, 157.470, 163.333, 164.423. ESI-MS (+ve mode, m/z): 296.42 (M + H<sup>+</sup>, 100%), Calc. for C<sub>18</sub>H<sub>17</sub>NO<sub>3</sub> is 295.33.

**$^1\text{H}$  NMR spectra of  $\text{L}_2$  in  $\text{CD}_3\text{CN}/\text{CDCl}_3$ :**

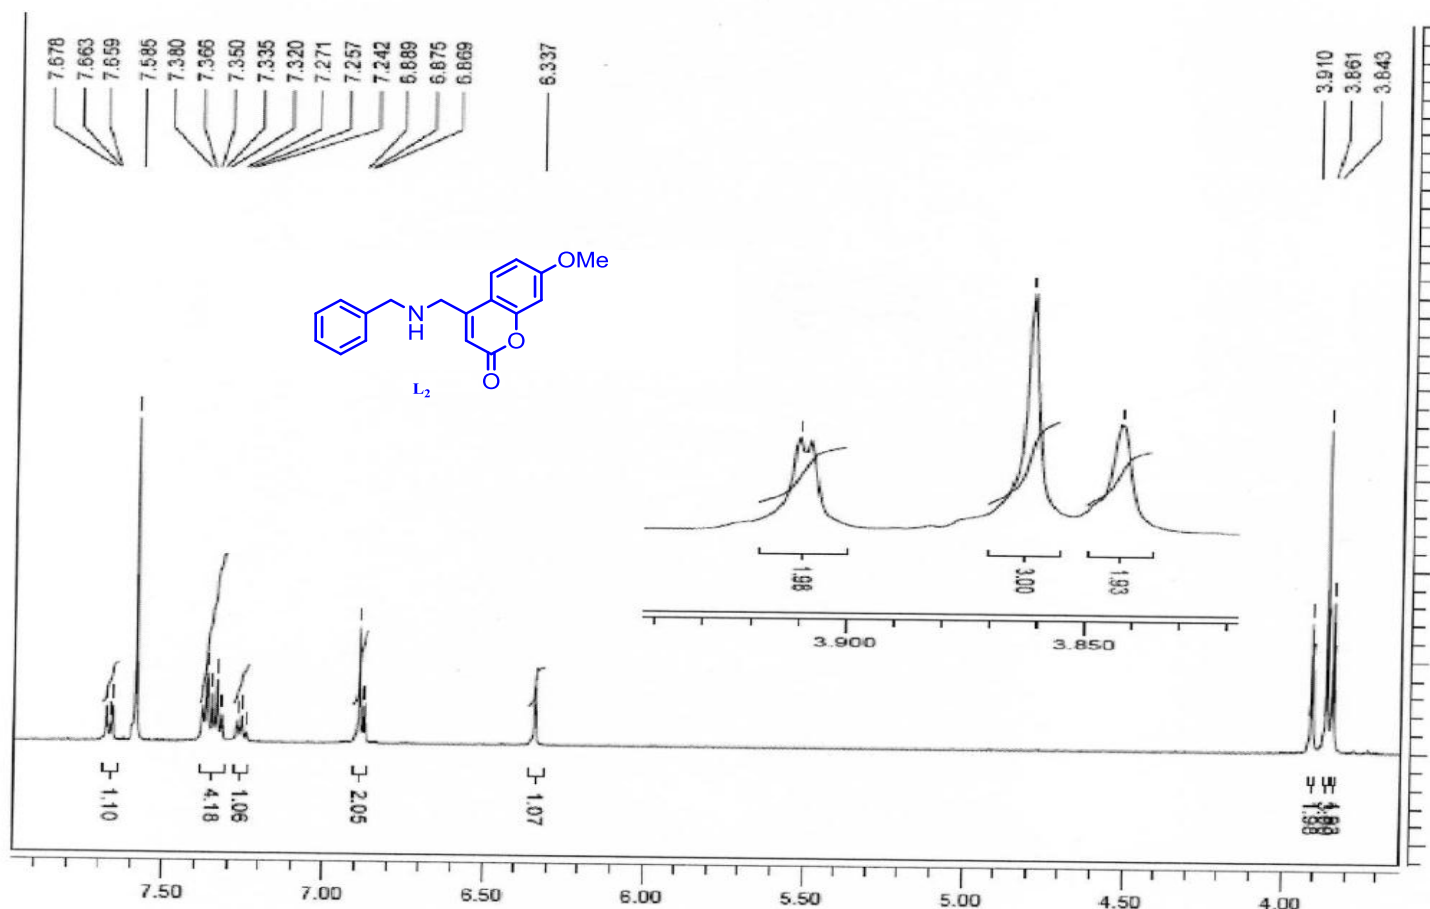

**SI Figure 5:**  $^1\text{H}$  NMR of  $\text{L}_2$  in  $\text{CD}_3\text{CN}/\text{CDCl}_3$  (1:1, v/v).



<sup>13</sup>C NMR spectra of L<sub>3</sub> in CD<sub>3</sub>CN/CDCl<sub>3</sub>:

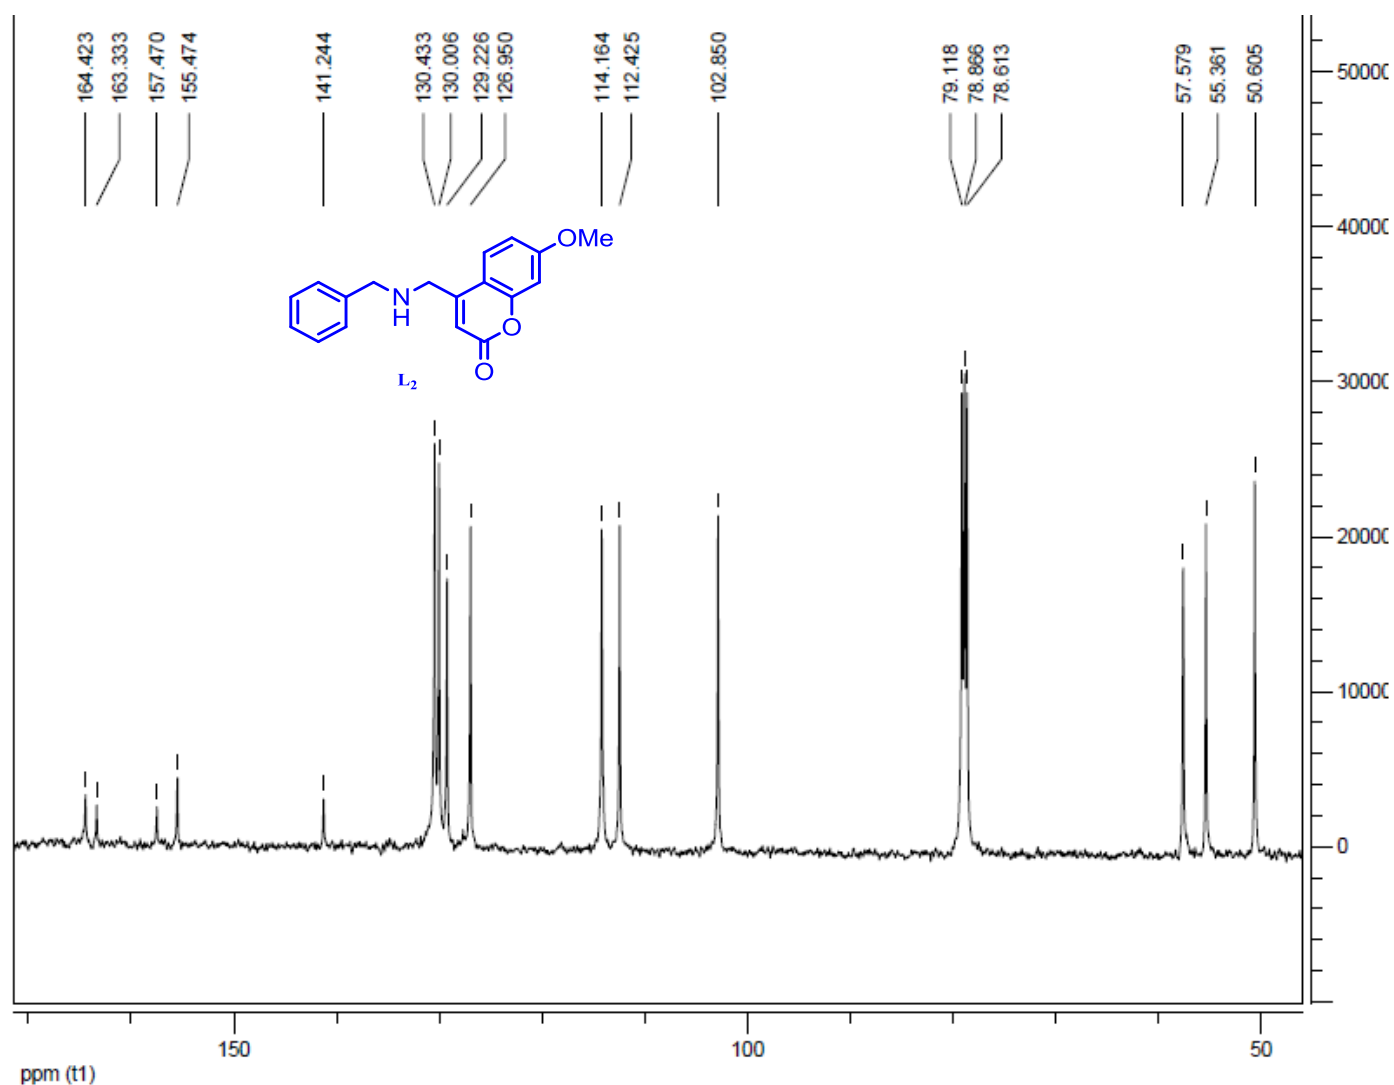

SI Figure 6: <sup>13</sup>C NMR of L<sub>2</sub> in CD<sub>3</sub>CN/CDCl<sub>3</sub> (1:1, v/v).

### ESI-MS spectra of L<sub>2</sub>.

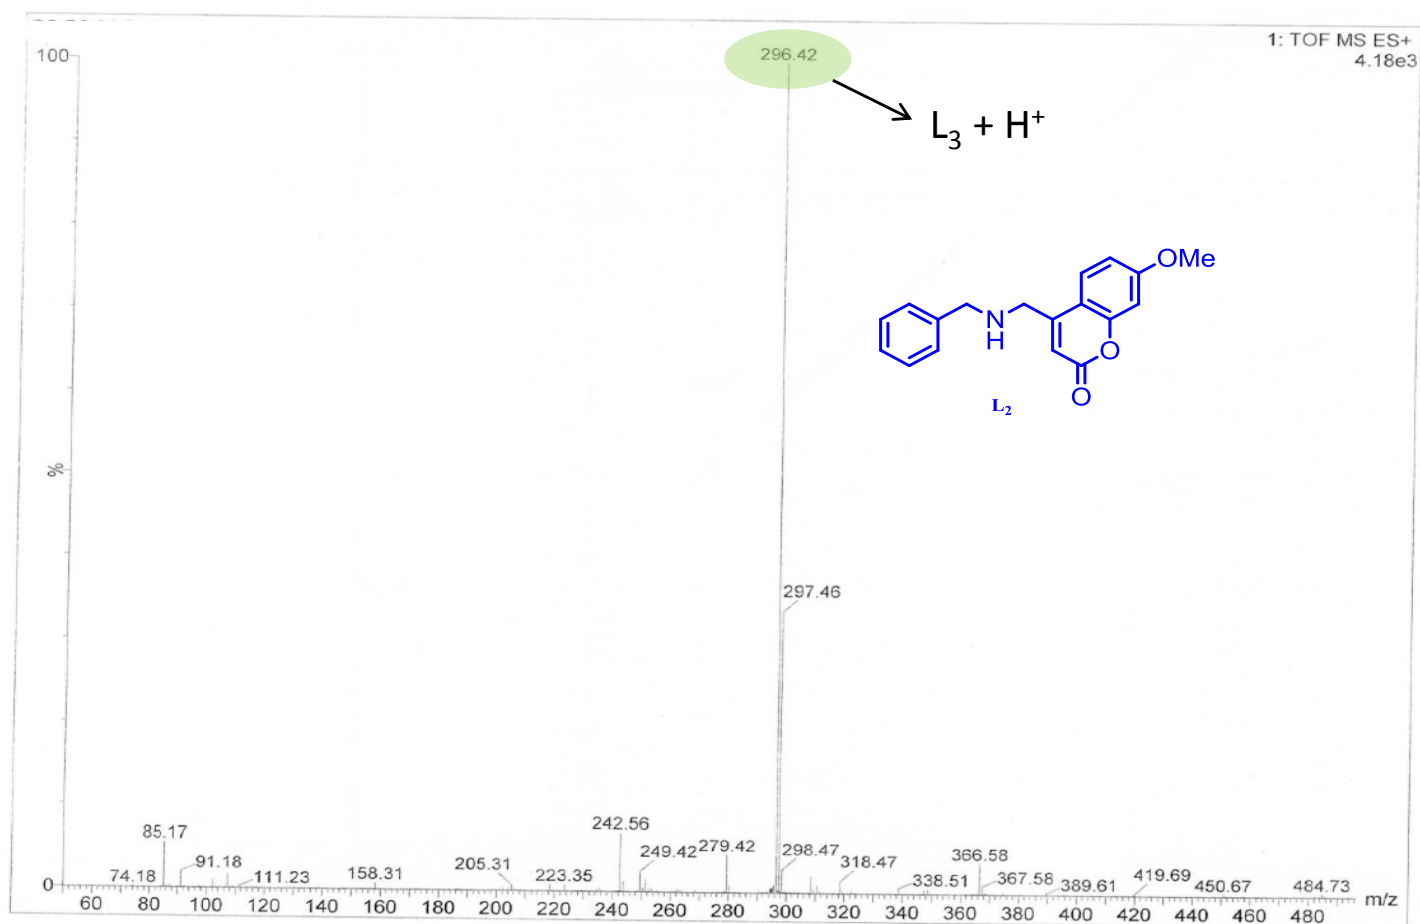

SI Figure 7: ESI-MS spectra of L<sub>2</sub>.

**$^{13}\text{C}$  NMR of  $\text{L}_1$  in absence and in presence of  $\text{Hg}^{2+}$  in  $\text{CDCl}_3/\text{CD}_3\text{CN}$ :**

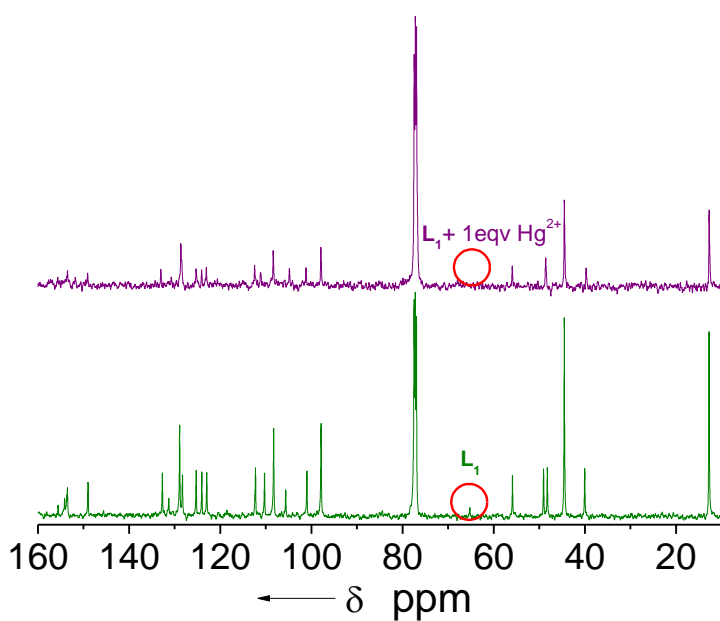

**SI Figure 8:**  $^{13}\text{C}$  NMR of  $\text{L}_1$  in absence and in presence of  $\text{Hg}^{2+}$  in  $\text{CDCl}_3/\text{CD}_3\text{CN}$ .

**Beneshi-Hildebrand (B-H) plot obtained from the spectrophotometric titration of L<sub>1</sub> with Hg<sup>2+</sup>:**

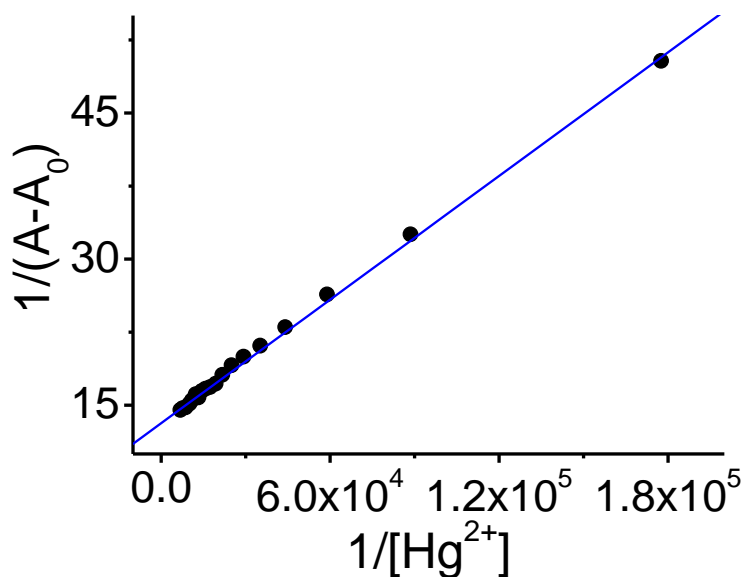

**SI Figure 9:** Beneshi-Hildebrand (B-H) plot obtained from the spectrophotometric titration of L<sub>1</sub> with Hg<sup>2+</sup> supported 1:1 binding stoichiometry ( $R^2=0.99723$ ).

**Beneshi-Hildebrand (B-H) plot obtained from the emission titration of L<sub>1</sub> with Hg<sup>2+</sup>:**

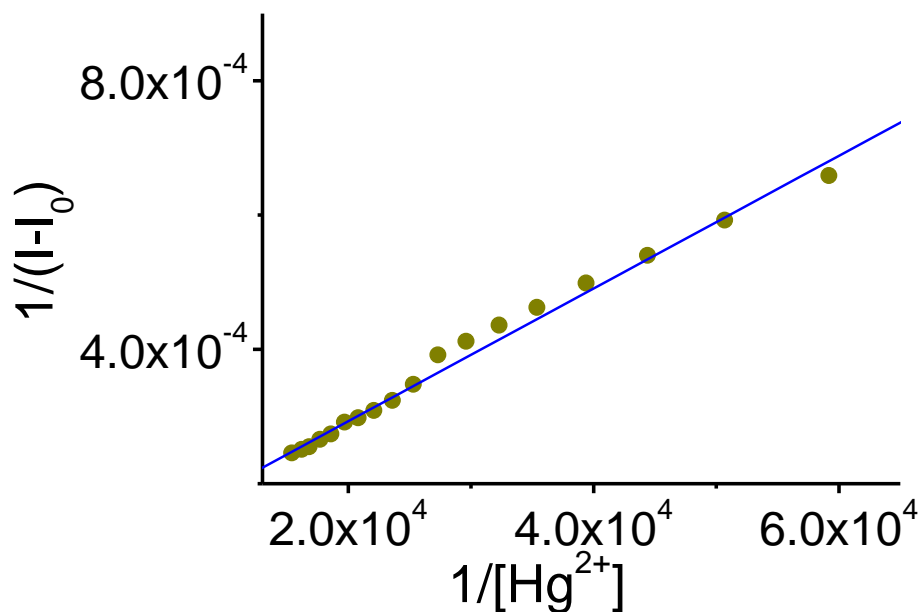

**SI Figure 10:** Beneshi-Hildebrand (B-H) plot obtained from the emission titration of L<sub>1</sub> with Hg<sup>2+</sup> supported 1:1 binding stoichiometry ( $R^2=0.994$ ).

**Equation used for calculation of Energy transfer efficiency (ETE %):**

$$\text{ETE \%} = \frac{\text{Quantum Yield of the acceptor fragment in the cassette excited at the donor}}{\text{Quantum Yield of the acceptor fragment in the cassette excited at the acceptor}} \times 100$$

**Reference:**

C. Thivierge, J. Han, R. M. Jenkins and K. Burgess, *J. Org. Chem.*, 2011, 76, 5219.

### ESI-MS spectral evidence for the 1:1 adducts formation of L<sub>1</sub> with Hg<sup>2+</sup>:

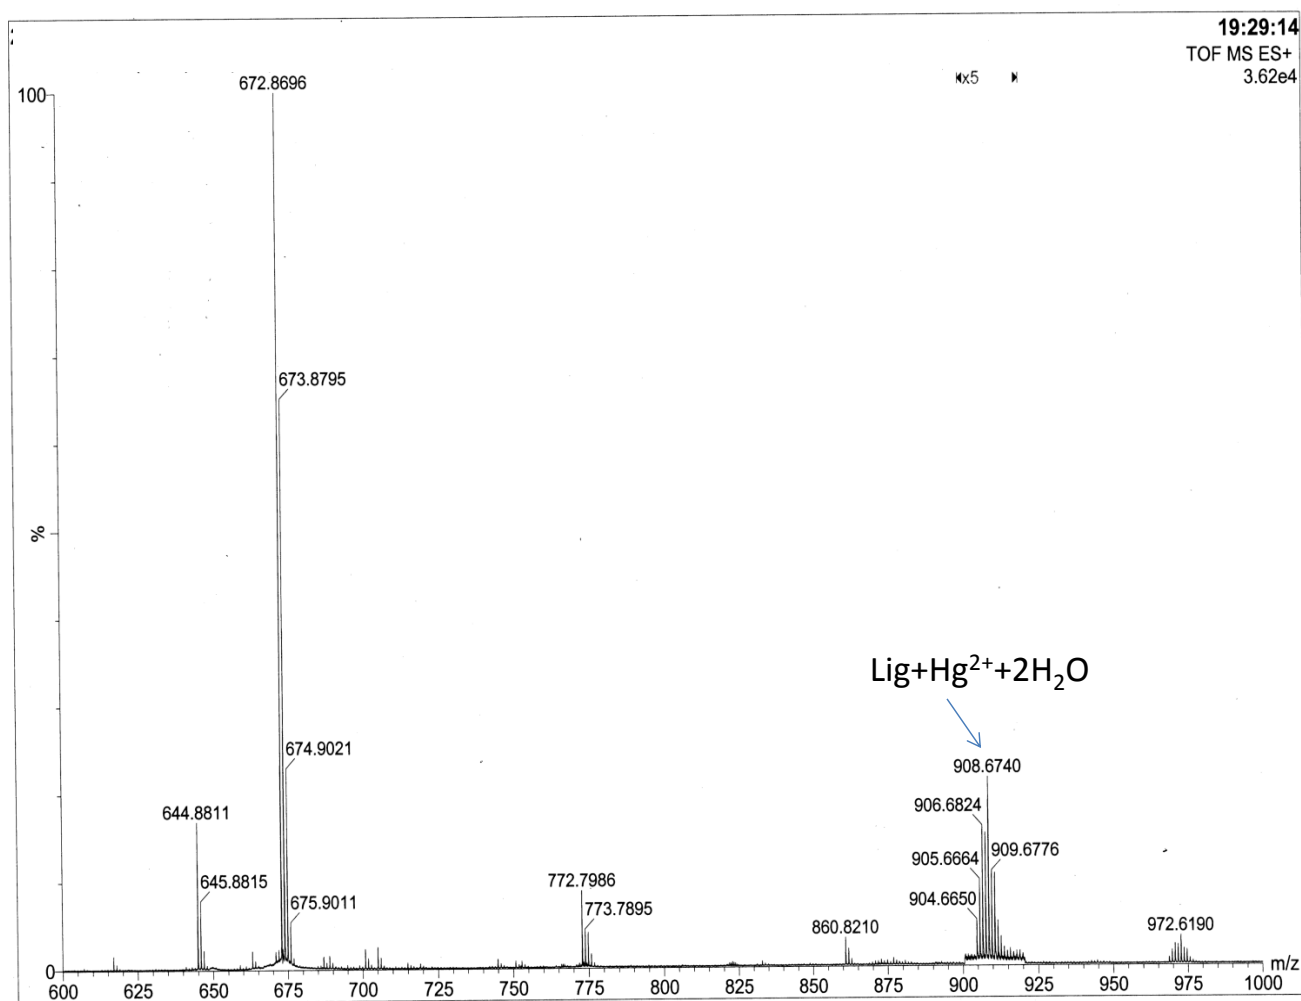

SI Figure 11: ESI-MS spectral evidence for 1:1 adducts formation of L<sub>1</sub> with Hg<sup>2+</sup>.

**Partial  $^1\text{H}$  NMR titration of  $\text{L}_1$  as a function of  $\text{Hg}(\text{ClO}_4)_2$ :**

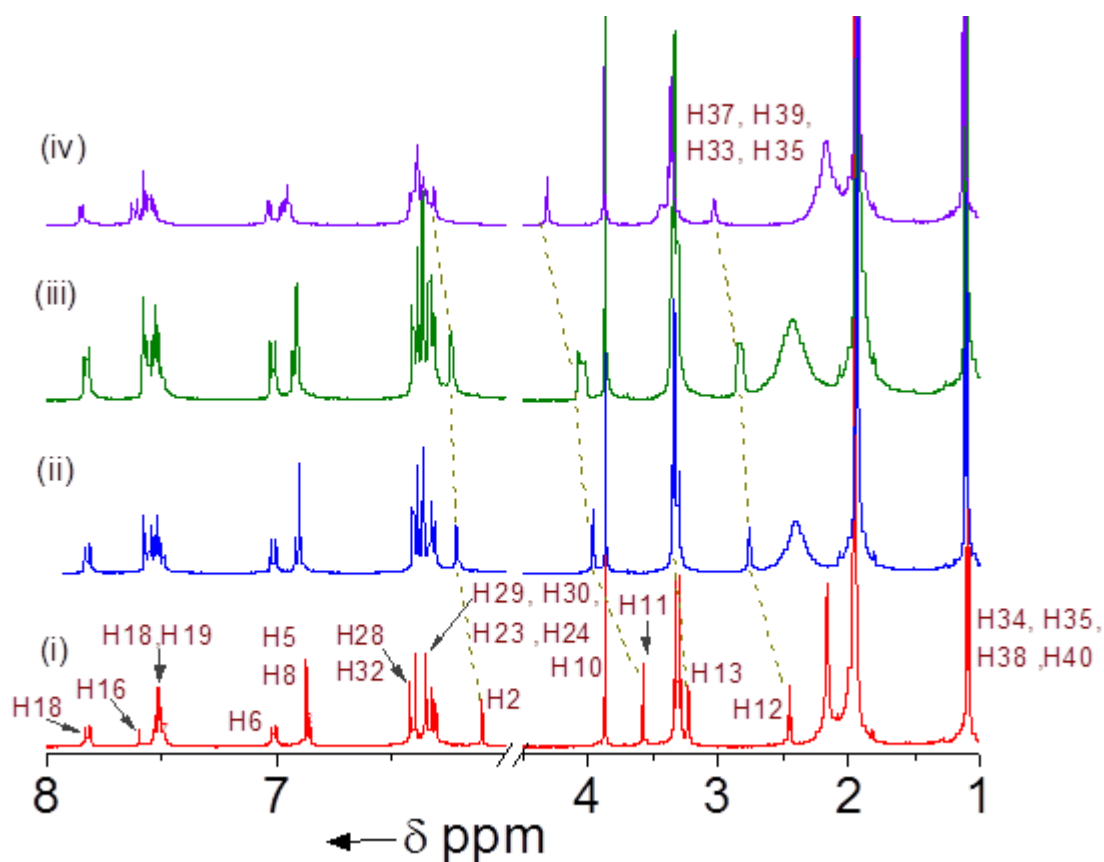

**SI Figure 12:** A plot of change in  $^1\text{H}$  NMR spectral pattern for the receptor (i)  $\text{L}_1$ ; (ii)  $\text{L}_1$  with 0.5 eqv  $\text{Hg}^{2+}$ ; (iii)  $\text{L}_1$  with 0.75 eqv  $\text{Hg}^{2+}$  and (iv)  $\text{L}_1$  with 1 eqv.  $\text{Hg}^{2+}$  in  $\text{CD}_3\text{CN}$  medium.



**Spectrophotometric interference study of  $L_1$  with  $Hg^{2+}$  in presence of various metal ions:**

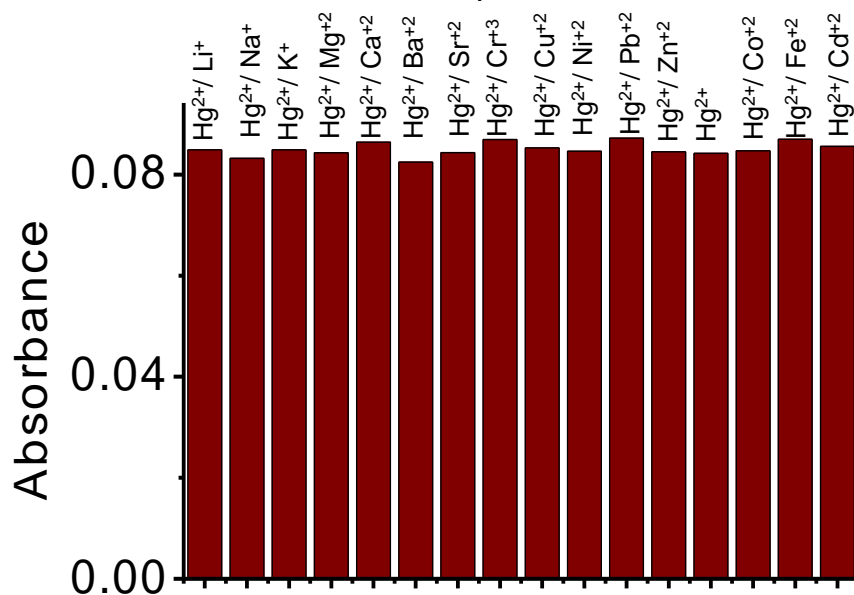

**SI Figure 13:** Spectrophotometric interference study of  $L_1$  ( $6.7 \times 10^{-6}$  M) with  $Hg^{2+}$  ( $1.2 \times 10^{-3}$  M) in presence of various metal ions ( $6.0 \times 10^{-4}$  M) in MeOH/ HEPES buffer (1:1, v/v).

**Uv-Vis spectral studies for establishing the reversible binding of  $\text{Hg}^{2+}$  to the  $\text{L}_1$ :**

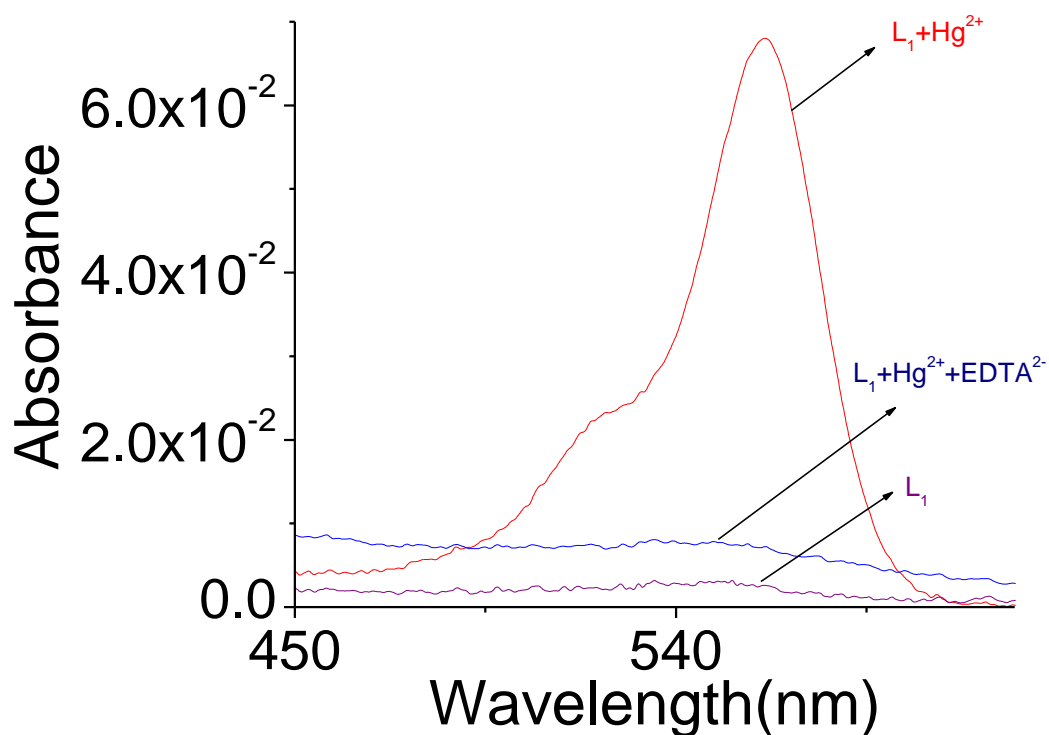

**SI Figure 14:** Uv-Vis studies for establishing the reversible binding of  $\text{Hg}^{2+}$  ( $1.53 \times 10^{-4}$  M) to  $\text{L}_1$  ( $6.9 \times 10^{-5}$  M) in presence of  $\text{EDTA}^{2-}$  ( $2 \times 10^{-3}$  M) in MeOH-Water (1:1, v/v).

**Change of Emission intensity of L<sub>1</sub> at 585 nm as a function of the solution pH:**

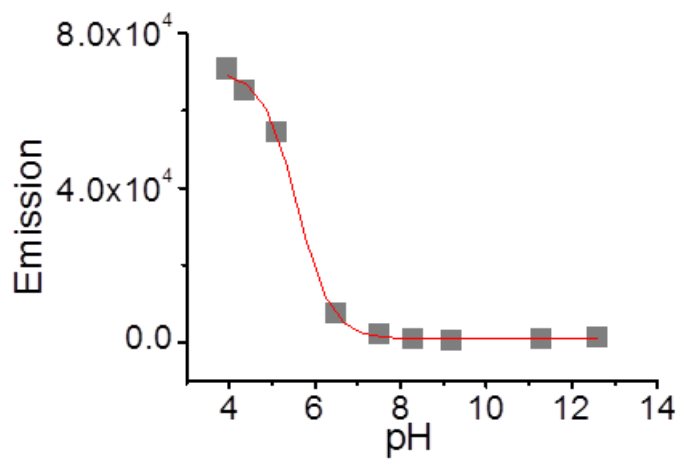

**SI Figure 15:** Change in emission intensity at 585 nm with variation in pH of the MeOH-water (1:1, v/v) solution for L<sub>1</sub> ( $6.7 \times 10^{-6}$  M).

### FTIR Spectra of $L_1$ in presence of 5 equivalent of $Hg(ClO_4)_2$ :

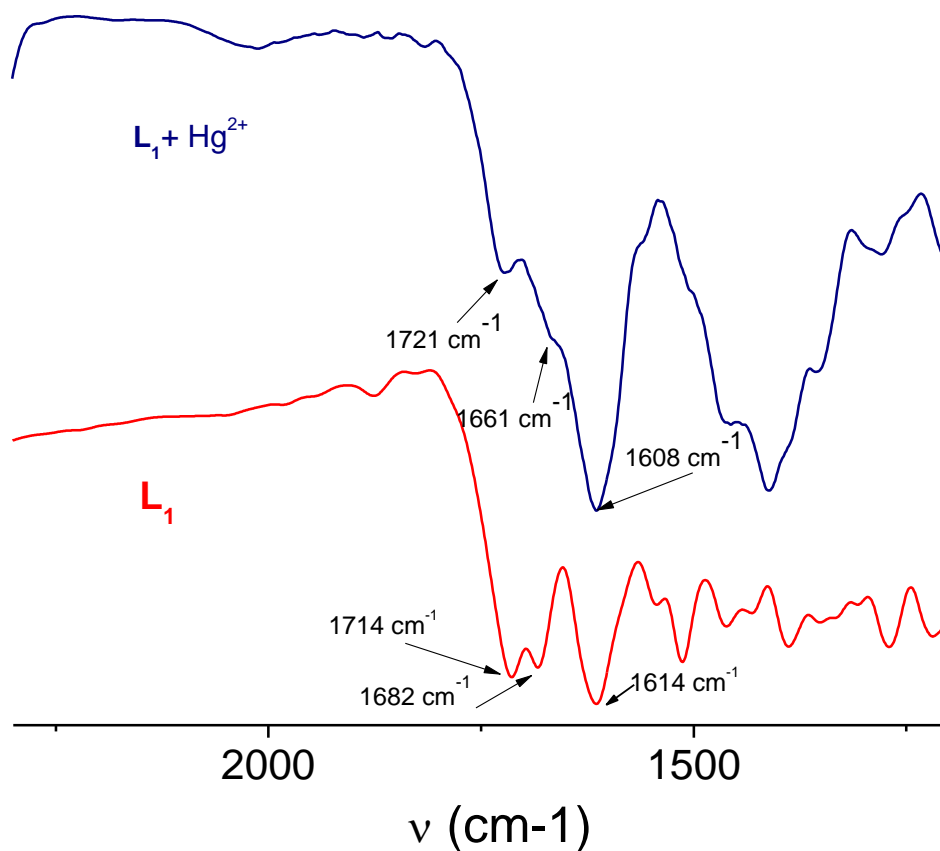

**SI Figure 16:** FTIR spectra of  $L_1$  in presence of 5 equivalent of  $Hg(ClO_4)_2$ .

FTIR spectra have been recorded to understand the binding mode of  $Hg^{2+}$  with  $L_1$  in presence of 5 mole equivalent of  $Hg(ClO_4)_2$ . In  $L_1$ , two carbonyl stretching were observed which are belong to coumarin C=O bond and amide carbonyl moiety from rhodamine unit. The peak appeared at the stretching frequency  $1714\text{ cm}^{-1}$  could be appeared from coumarine moiety while peak at  $1682\text{ cm}^{-1}$  could be appeared from amide carbonyl of rhodamine as amide stretching frequency should be lowered compared to the ester carbonyl frequency. The lowering of the stretching frequency of the amide carbonyl from  $1682\text{ cm}^{-1}$  to  $1661\text{ cm}^{-1}$  indicated definite coordination of  $Hg^{2+}$  to the amide C=O bond. However, a slight increment in the stretching frequency of the ester C=O was due to lowering of overall electron density on the coumarin moiety after coordination to metal ions thus no participation of ester C=O in  $Hg^{2+}$  coordination.

**Bar Diagram for changes in absorbance intensity for L<sub>1</sub> with metal ions:**

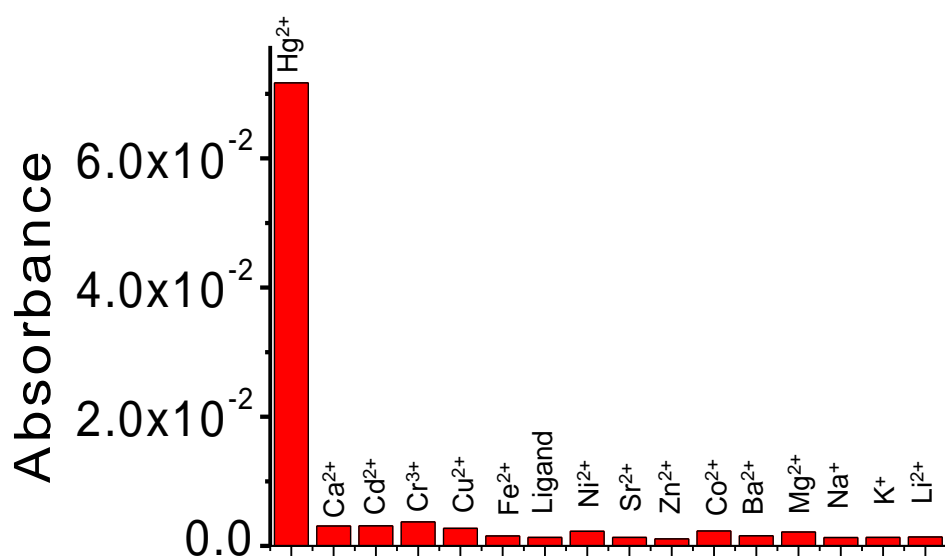

**SI Figure 17:** Bar diagram for the changes in absorbance intensity of L<sub>1</sub>(6.7 × 10<sup>-6</sup> M) with metal ions(1.0 × 10<sup>-4</sup> M).

**Bar Diagram for changes in emission intensity for L<sub>1</sub> with metal ions:**

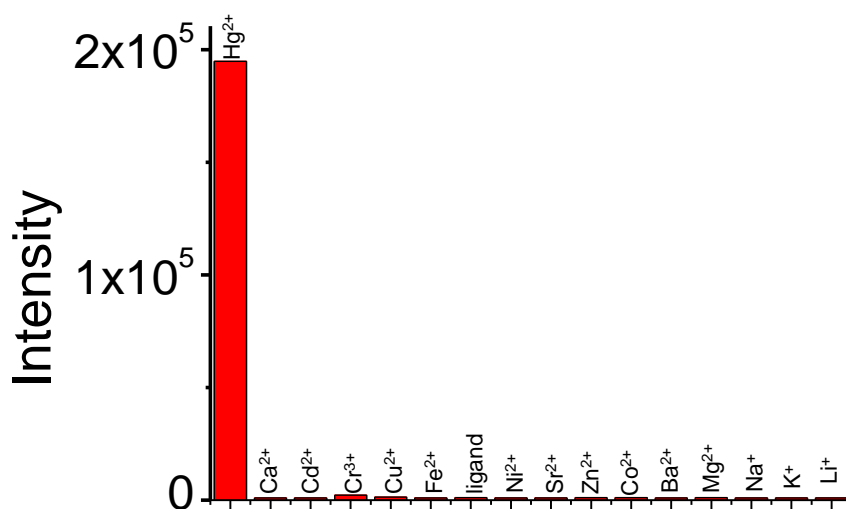

**SI Figure 18:** Bar diagram for the changes in absorbance intensity of L<sub>1</sub> ( $6.7 \times 10^{-6}$  M) with metal ions ( $1.5 \times 10^{-4}$  M).

Job's plot for  $L_1$  with  $Hg^{2+}$  showing 1:1 stoichiometry:

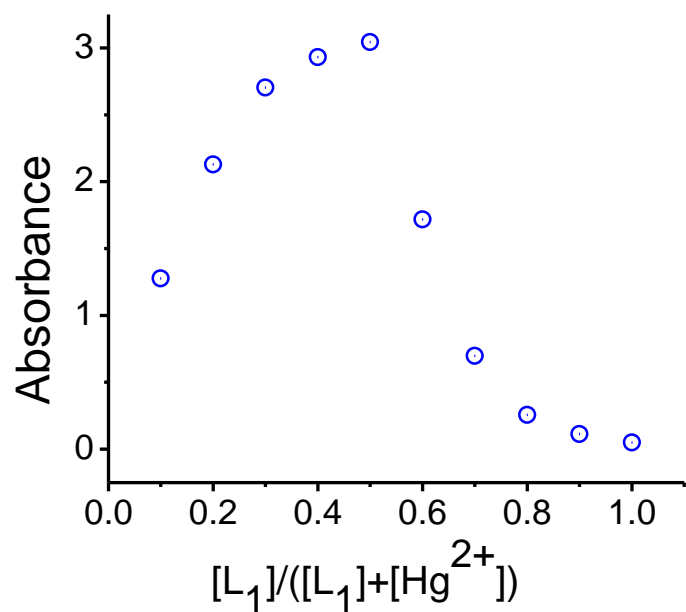

SI Figure 19: Job's plot between  $L_1$  and  $Hg^{2+}$  confirmed 1:1 adducts.

**Absorption spectra of L<sub>1</sub> in presence of Hg<sup>2+</sup> at different pH:**

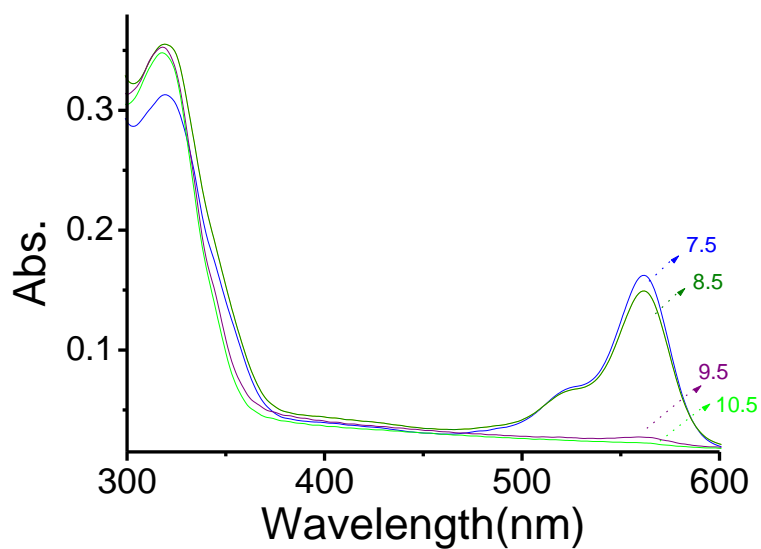

**SI Figure 20:** Absorption spectra for L<sub>1</sub>(6.9 × 10<sup>-6</sup> M) in presence of Hg<sup>2+</sup>(1.0 × 10<sup>-4</sup> M) at different basic pH.



**Emission spectra of L<sub>1</sub> in presence of Hg<sup>2+</sup> at different pH:**

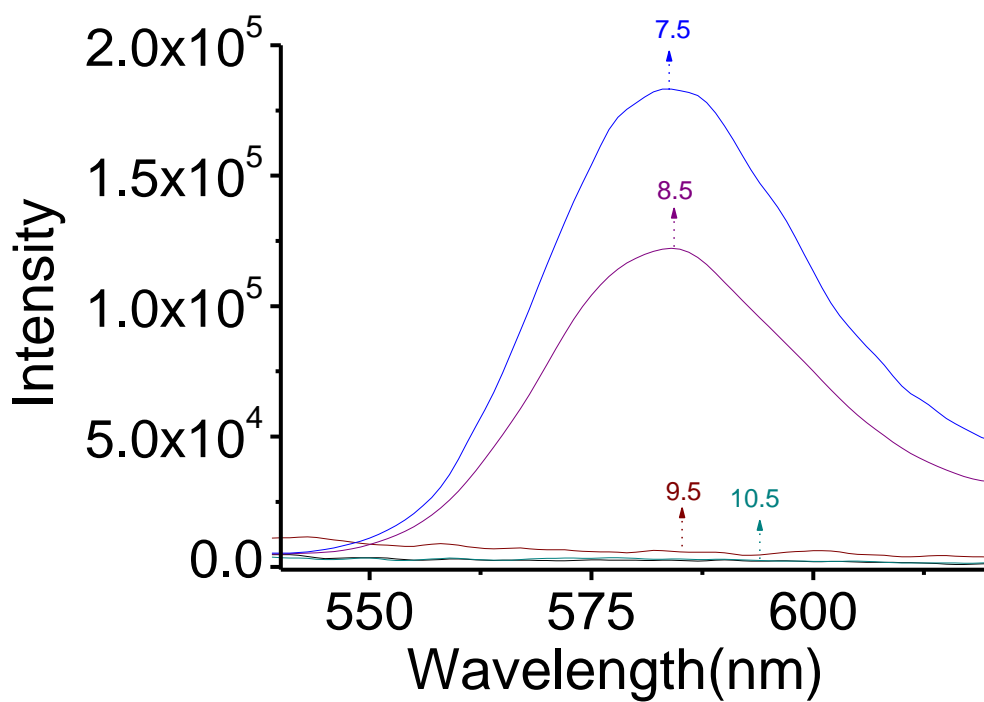

**SI Figure 21:** Emission spectra for L<sub>1</sub> ( $6.9 \times 10^{-5}$  M) in presence of Hg<sup>2+</sup> ( $1.0 \times 10^{-4}$  M) at different basic pH ( $\lambda_{\text{Ext}}$  320 nm).

**Confocal microscopic images of L<sub>1</sub> in presence and in absence of Hg<sup>2+</sup> in MCF7 cells:**

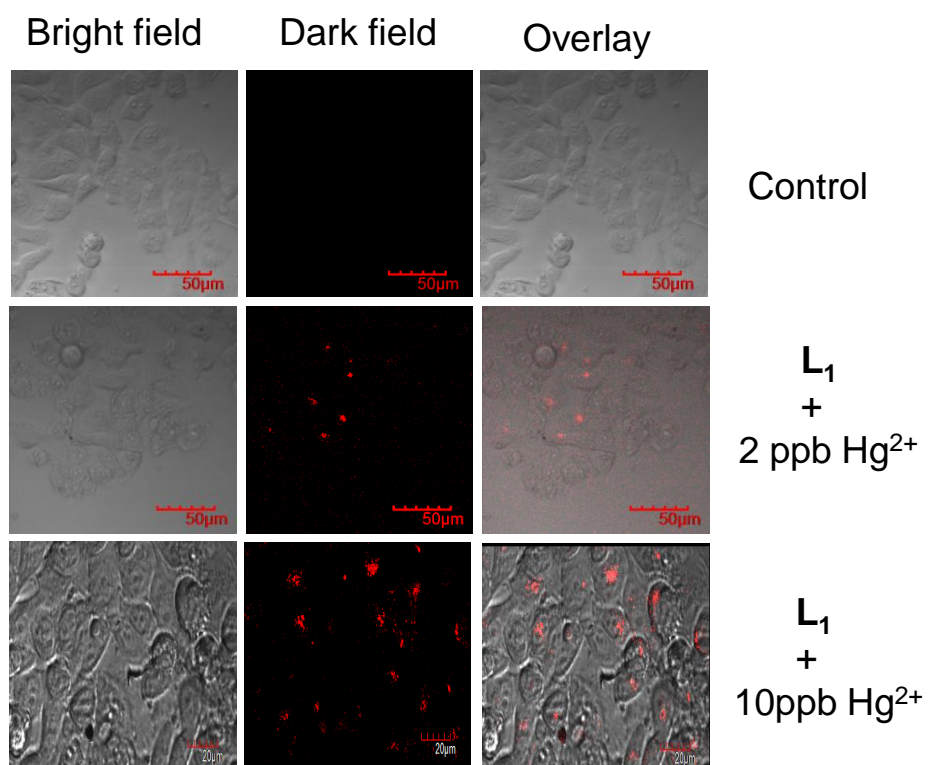

**SI Figure 22:** Confocal microscopic images of L<sub>1</sub> (10 µM) in absence and in presence of Hg<sup>2+</sup> (2-10ppb) in MCF7 cells ( $\lambda_{Ext}$  543nm).

**Fluorescence microscopic images of  $L_1$  in presence and in absence of  $Hg^{2+}$  in MCF7 cells:**

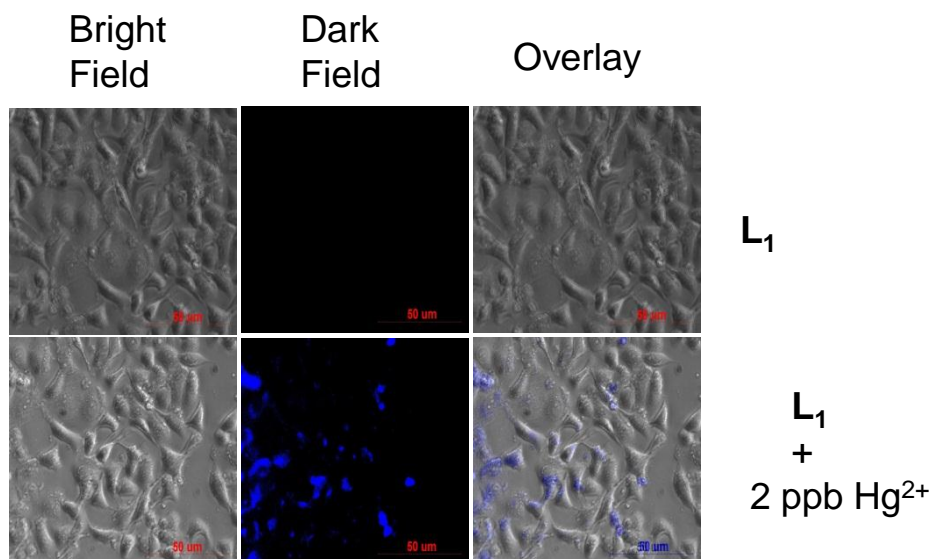

**SI Figure 23:** Fluorescence microscopic images of  $L_1$  (10  $\mu$ M) in absence and in presence of  $Hg^{2+}$  (2ppb) in MCF7 cells ( $\lambda_{Ext}$  330-385nm).

**Reversibility studies for binding of the reagent L<sub>1</sub> to Hg<sup>2+</sup> present in the breast cancer cell (MCF7 cells) with subsequent treatment with KI:**

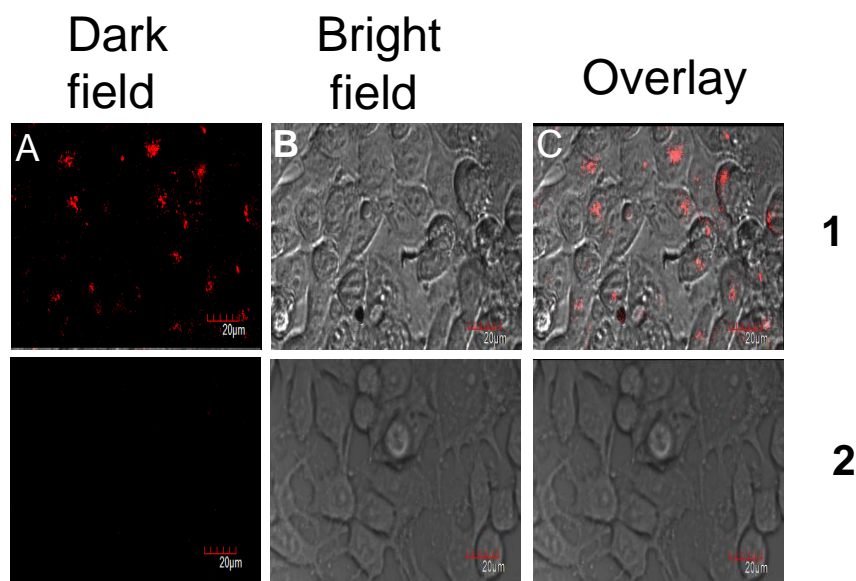

**SI Figure 24:** Confocal dark field (A), Bright field (B), and overlay images (C) of MCF7 cells. (1) The cells were supplemented with Hg<sup>2+</sup> (10 ppb) and then were stained with 10 μM of L<sub>1</sub> for 1.0 h at 37°C, (2) with Hg<sup>2+</sup> (10 ppb), 10 μM L<sub>1</sub> and then KI (30 μM) in the growth media for 1.0 h at 37 °C ( $\lambda_{\text{ext}} = 543 \text{ nm}$ ).

### MTT assay studies for evolution of cytotoxicity of the reagent $L_1$ towards the breast cancer cell (MCF7 cells):

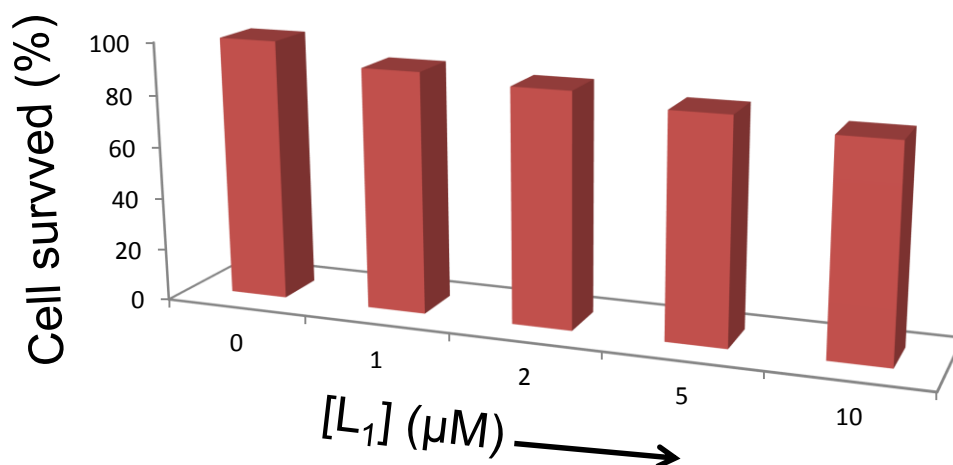

**SI Figure 25:** Check of viability of  $L_1$  on the breast cancer cells (MCF7 cells). Here % of viability was calculated with respect to the growth considering 100% without  $L_1$ .

#### Cell Cytotoxicity Assay

Cytotoxicity of  $L_1$  on MCF7 cells was determined by conventional MTT assay (*J. Natl. Cancer Inst.*, **1990**, *8*, 1113-1117). MCF7 cells in their exponential growth phase were trypsinised and seeded in 96-well flat-bottom culture plates at a density of  $3 \times 10^3$  cells per well in 100  $\mu\text{l}$  DMEM complete medium (Himedia, India). The cells were allowed to adhere and grow for 24 hr at 37  $^\circ\text{C}$  in  $\text{CO}_2$  incubator (New Brunswick Scientific, U.S.A.), and then the medium was replaced with 100  $\mu\text{l}$  fresh incomplete medium containing various concentrations of  $L_1$  (0 to 10  $\mu\text{M}$ ). The assay was performed in quadruplet for each concentration. Cells were then incubated for 12h, after which the culture medium was removed, and 100  $\mu\text{l}$  of 1 mg/ml MTT reagent in PBS was added to each well. Thereafter, it was incubated for 4 hrs; during this period active mitochondria of viable cells reduce MTT to purple formazan. Unreduced MTT were then discarded and DMSO (100  $\mu\text{l}$ ) was added into each well to dissolve the formazan precipitate, which was then measured spectrophotometrically using a microplate reader at 570 nm. The cytotoxic effect of each treatment was expressed as percentage of cell viability relative to the untreated control cells. [MTT= (3-(4, 5-Dimethylthiazol-2-yl)-2, 5-diphenyltetrazolium bromide, a yellow tetrazole].

**Reference:** L. V. Rubinstein, K. D. Paull, R. M. Simon, P. Skehan, D. A. Scudiero, A. Monks and M. R. Boyd, *J. Natl. Cancer Inst.*, 1990, **82**, 1113.
